# Supplementary material for: The bis-phenanthridinium system flexibility and position of covalently bound uracil finely tunes the interaction with polynucleotides
Source: Royal Society of Chemistry journal article supplement (doi:10.1039/c3mb25578f), 2013-04-15
Supplement: c3mb25578f.pdf [file c3mb25578f.pdf]

## Supplementary Data

### Synthesis

The general strategy that was used for the synthesis of the novel rigid asymmetric bis-phenanthridinium-nucleobase conjugate **7** was the same as for previously prepared flexible conjugates<sup>1</sup> and comprised asymmetric alkylation of the amino substituents of bis-phenanthridine **2** mono- with a dibromopropane, followed by the introduction of nucleobase uracil at the other end of one alkyl linker (Scheme 1), and finally by deprotection of tosylated compound

The compound **1** was prepared starting from *N,N'*-bis-[(4'-amino)-2-biphenylyl]-phenylenediacetamid<sup>2</sup> that was tosylated in pyridine. The bis-phenanthridine **2** was obtained by the Morgan-Walls reaction<sup>3</sup> based on the middle pyridine ring formation by intramolecular electrophilic cyclization of the bis-biphenylyl **1** using POCl<sub>3</sub>. Then, one of two tosyl-amino groups of phenanthridine **2** was alkylated in the first reaction step over seven days in a dark and at room temperature, using small excess (1.5 eq) of 1-bromopropane. Afterwards, a large excess of potassium carbonate and 1,3-dibromopropane were added dropwise in situ, in order to obtain asymmetric compound **3**. Finally, the reaction of bromo-derivative **3** with large excess of uracil was performed under argon atmosphere at 40-50 °C in dry DMF in the presence of NaH, giving tosyl-protected conjugate **4**. Under these conditions the alkylation of uracil selectively occurred at N1 position. (Scheme 1).

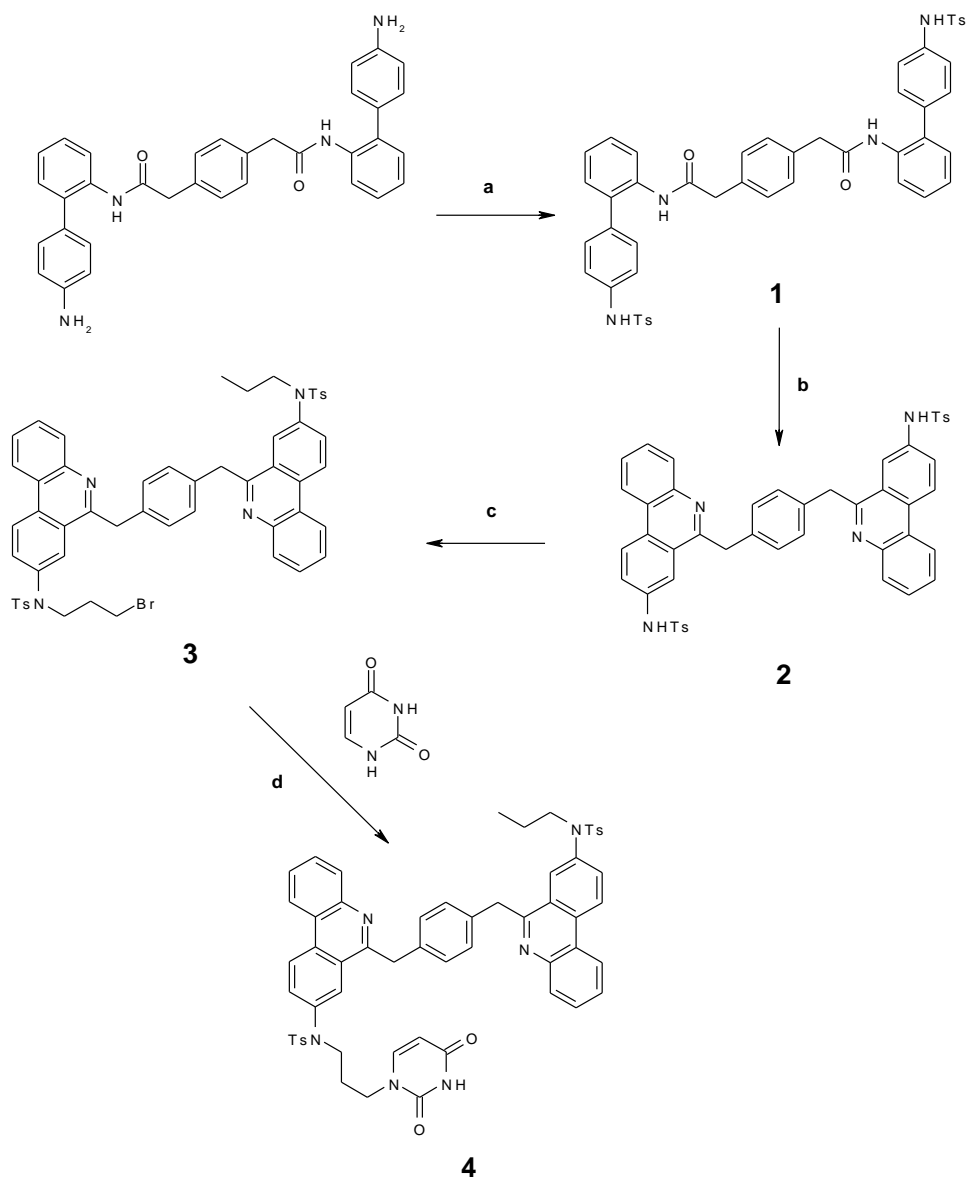

**Scheme 1.** The synthesis of asymmetric conjugate **4**; (a) TsCl / pyridine / 40-50 °C; (b1) POCl<sub>3</sub> / 120 °C (b2) NaOH / H<sub>2</sub>O; (c1) Br(CH<sub>2</sub>)<sub>2</sub>CH<sub>3</sub> (1 eq) / K<sub>2</sub>CO<sub>3</sub> / DMF / Ar / r.t. (c2) Br(CH<sub>2</sub>)<sub>3</sub>Br (10 eq) / K<sub>2</sub>CO<sub>3</sub> / DMF / Ar / r.t.; (d) NaH / DMF / Ar / 40-50 °C

Flexible protected cyclobisintercaland **5** was obtained by alkylation of previously prepared bisphenanthridine1. Bisphenanthridine1 was alkylated using small excess of 1,3-dibromopropane under high dilution conditions in order to obtain compound **5**. (Scheme 2). To obtain cyclobisintecalnd **6**, uracil was alkylated in dry DMF in the presence of potassium carbonate. Resulted bromo-uracile derivative<sup>4</sup> reacted with bisphenanthridine1 in dry DMF under basic conditions and inert atmosphere at 80-100

°C to give cyclic bisphenanthridine **6**, bridged by hexylene chain as well as by uracil moiety. (Scheme 2)

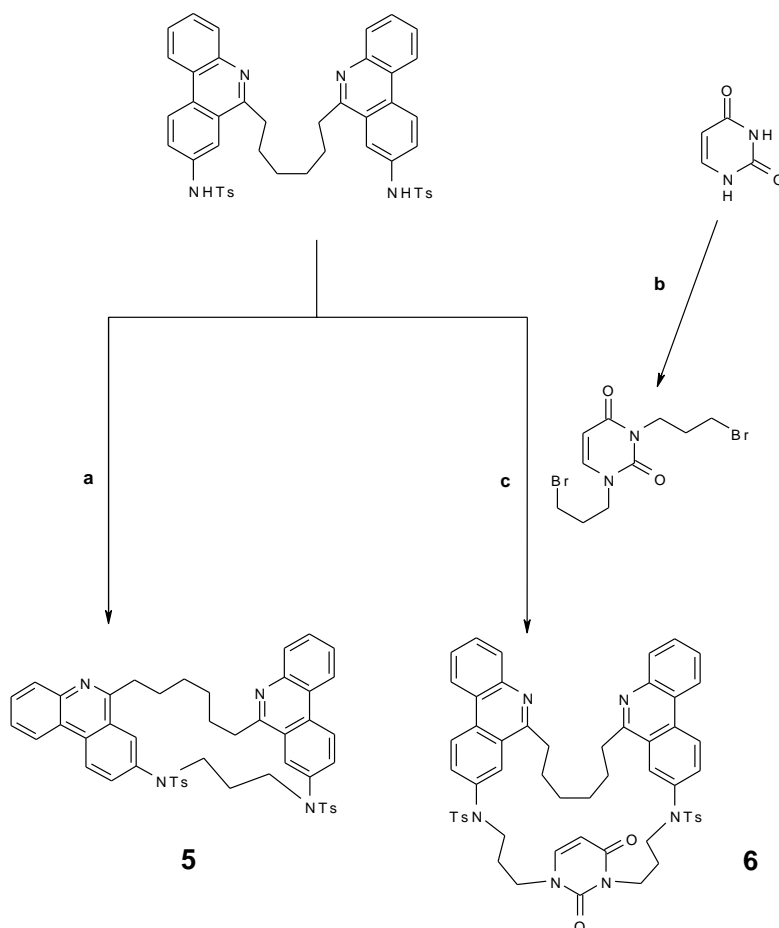

**Scheme 2.** The synthesis of cyclobisphenanthridines **5** and **6**; (a)  $\text{Br}(\text{CH}_2)_3\text{Br}$  (1.5 eq) /  $\text{K}_2\text{CO}_3$  / DMF / Ar / r.t.; (b)  $\text{Br}(\text{CH}_2)_3\text{Br}$  (10 eq) /  $\text{K}_2\text{CO}_3$  / DMF / Ar / r.t.; (c)  $\text{K}_2\text{CO}_3$  / DMF / Ar / r.t.

Tosyl-groups of **4-6** were removed by heating at 100 °C under acidic conditions, followed by neutralization using 5 M NaOH aqueous solution. Compounds **7-9** were found to be sufficiently soluble in water under acidic conditions (pH 5).

All here presented compounds (**1-9**), synthesized by modified procedures elaborated earlier for their close analogues <sup>1, 2, 5, 6</sup> have satisfying mass spectra and their structures were verified by detailed 1D and 2D NMR analysis.

## Materials and methods

$^1\text{H}$  NMR and  $^{13}\text{C}$  NMR spectra were recorded on a Bruker Avance DRX 500 operating at 500 MHz. Chemical shifts ( $\delta$ ) are expressed in ppm, and  $J$  values in Hz. Signal multiplicities are denoted as s (singlet), d (doublet), t (triplet), q (quartet) and m (multiplet). The electronic absorption spectra of newly prepared compounds were measured on a Varian Cary 100 Bio spectrometer in quartz cuvettes (1 cm). UV-Vis titration were performed on a Varian Cary 100 Bio spectrometer. IR spectra were recorded on a Perkin–Elmer 297 instrument using KBr pellets. Fluorescence spectra were recorded on Varian Cary Eclipse fluorimeter. CD spectra were recorded on JASCO J815 spectrophotometer using appropriate 1 cm path quartz cuvettes. Mass spectra were obtained using Applied Biosystems 4800 *Plus* MALDI TOF/TOF™ Analyzer. Preparative thin layer chromatography (TLC) was carried out using Kieselgel HF<sub>254</sub> “Merck”. Melting points were determined on Kofler apparatus and are uncorrected. All products were characterized by NMR, IR, ESI-MS or HRMS. Hygroscopic character of compounds yielded elemental analyses with non-stoichiometric amounts of water – however, since NMR spectra of final compounds were in accordance with other, previously prepared close analogues, proposed structures were not questionable.

***N,N'*-bis-[(4'-tosylamino)-2-biphenyl]-phenylenediacetamide (1)**

Solution of tosyl-chloride (3.04 g, 15.9 mmol) in 15 ml of pyridine was added dropwise during 1 h to the ice-cold solution of *N,N'*-bis-[(4'-amino)-2-biphenyl]-phenylenediacetamide<sup>2</sup> (1.4 g, 2.66 mmol) in 15 ml of pyridine. After adding was completed, reaction mixture heated at 50-60 °C during 4 h. Subsequently, reaction mixture was allowed to cold and then poured into water. Therefore light yellow solid precipitated. Pure compound **1** was obtained by TLC as white solid (1.26 g, 57 %), additionally recrystallized from MeOH.  $R_f$  (SiO<sub>2</sub>, 2 % MeOH in CH<sub>2</sub>Cl<sub>2</sub>) = 0.20; mp 259-260 °C;  $^1\text{H}$ -NMR (DMSO- $d_6$ )  $\delta$ : 2.29 (s, Ts-CH<sub>3</sub>, 6 H), 3.66 (s, CH<sub>2</sub>, 4 H), 7.11 (d, Ts, 4H,  $J$  = 8.6 Hz), 7.23-8.63 (m, Ar-H, 28 H), 9.35 (s, NH-CO, 2 H), 10.39 (s, NH-Ts, 2 H) ppm;  $^{13}\text{C}$ -NMR (DMSO- $d_6$ )  $\delta$ : 20.95, 42.28, 119.19, 125.89, 126.74, 126.81, 127.55, 129.06, 129.54, 129.76, 130.04, 133.88, 133.93, 134.60, 135.49, 136.95, 137.00, 143.29, 169.51; IR (KBr)  $\nu$ : 3362, 3144, 3030, 2922, 2856, 2363,

1655, 1610, 1585, 1445, 1340, 1340, 1340, 1227, 1157, 1092, 914, 831, 814, 766, 704, 663, 636, 571, 546, 482  $\text{cm}^{-1}$ ; Anal. Calcd for  $\text{C}_{48}\text{H}_{42}\text{N}_4\text{O}_6\text{S}_2$  (Mr 835.02  $\text{g mol}^{-1}$ )  $\times 1/2 \text{ H}_2\text{O}$ : C 68.25, H 5.09, N 6.63 %; Found: C 68.35, H 5.13, N 6.65 %; (MALDI / TOF-HRMS)  $m/z$ : 835.2625 (cald. for  $\text{C}_{48}\text{H}_{42}\text{N}_4\text{O}_6\text{S}_2$ : 835.2619).

**1,4-Bis-[(8-tosilaminofenantridin-6-il)-metil]benzen (2)**

Compound **2** was obtained by suspending of *N,N'*-bis-[(4'-tosylamino)-2-biphenyl]-phenylenediacetamide **1** *N* (1.2 g; 1.4 mmol) in 8 ml  $\text{POCl}_3$  and heating reaction mixture at 100-110  $^\circ\text{C}$  during 3 h. Mixture was allowed to cold and poured into ice, and afterwards was made alkaline (pH = 8-9) by addition of 3 M NaOH water solution. Yellow solid precipitated and was filtered and washed with water to give pale yellow powder (1.3 g; 86 %);  $R_f$  ( $\text{SiO}_2$ , 10 % MeOH in  $\text{CH}_2\text{Cl}_2$ ) = 0.33; mp  $>300^\circ\text{C}$ ;  $^1\text{H-NMR}$  ( $\text{DMSO-d}_6$ ) 2.13 (s, Ts- $\text{CH}_3$ , 6 H), 4.52 (Phen- $\text{CH}_2$ ), 7.05 (d, Ts, 4H,  $J$  = 8.2 Hz), 7.25 (s, Ar-H, 4H), 7.48 (d, Ts, 4 H,  $J$  = 8.4 Hz), 7.58 (dd, 2 H, Phen-9,  $J_{7-9}$  = 2.2 Hz), 7.62 (t, 2 H, Phen-2), 7.68 (t, 2 H, Phen-3), 8.01 (d, 2H, Phen-4,  $J_{3-4}$  = 7.9 Hz), 8.14 (d, 2H, Phen-7), 8.58 (d, 2H, Phen-1,  $J_{1-2}$  = 8.2 Hz), 8.68 (d, 2H, Phen-10,  $J_{9-10}$  = 9.1 Hz) ppm;  $^{13}\text{C-NMR}$  ( $\text{DMSO-d}_6$ )  $\delta$ : 156.26, 143.30, 137.39, 136.98, 129.51, 129.20, 128.70, 128.62, 128.36, 126.97, 126.57, 125.09, 124.39, 123.34, 123.00, 122.19, 60.21, 20.78 ppm; IR (KBr)  $\nu$ : 3447, 3288, 2922, 2361, 2343, 1618, 1541, 1504, 1420, 1385, 1300, 1157, 1092, 970, 947, 891, 833, 816, 762, 667, 581, 542, 459, 419  $\text{cm}^{-1}$ ; (MALDI / TOF-HRMS)  $m/z$ : 799.2430 (cald. for  $\text{C}_{48}\text{H}_{38}\text{N}_4\text{O}_4\text{S}_2$ : 799.2407).

**1-[[8-(3-bromopropyltosyl)aminophenanthridine-6-il]-methyl]-4-[[8-(propyltosyl)aminophenanthridine-6-il]-methyl]benzene (3)**

1-bromopropane (45  $\mu\text{l}$ , 0.5 mmol, 1 equivalent) and  $\text{K}_2\text{CO}_3$  (69 mg, 0.5 mmol, 1 equivalent) were suspended in dry DMF (5 ml). To this suspension, solution of 1,4-bis-[(8-tosilaminofenantridin-6-il)-metil]benzen (**2**) (400 mg, 0.5 mmol, 1 equivalent) in dry DMF (5 ml) was added dropwise during 10 min. and the reaction mixture was stirred during 7 days under argon atmosphere at room temperature. Then, 1,3-dibromopropane (512  $\mu\text{l}$ , 5.14 mmol, 10 equivalents) and  $\text{K}_2\text{CO}_3$  (690 mg, 5 mmol, 10 equivalents) were added to reaction mixture, that was stirred during next two days under argon atmosphere at room temperature. Water and  $\text{CH}_2\text{Cl}_2$  were added to this

suspension, the water layer was washed twice with  $\text{CH}_2\text{Cl}_2$ , organic extracts were dried over  $\text{Na}_2\text{SO}_4$  and evaporated, yielding 280 mg of light brown solid residue. Pure compound **3** was obtained by TLC ( $\text{SiO}_2$ , 2% MeOH in  $\text{CH}_2\text{Cl}_2$ ,  $R_f = 0.37$ ) as white solid (90 mg, 19 % yield) and recrystallized from from methanol; mp 207-209 °C;  $^1\text{H}$ -NMR ( $\text{CDCl}_3$ )  $\delta$ : 0.62 (t,  $\text{CH}_3$ , 3H,  $J = 7.4$  Hz), 1.06 (m,  $\text{CH}_2$ -propyl chain, 2 H), 1.59 (m,  $\text{CH}_2$ -propylene chain, 2 H), 2.31 (s, Ts- $\text{CH}_3$ , 6 H), 3.11 (t,  $\text{CH}_2\text{Br}$ , 2 H,  $J = 5.8$  Hz), 3.38 (t,  $\text{NCH}_2$ -propyl chain, 2 H,  $J = 6.7$  Hz), 3.55 (t,  $\text{NCH}_2$ -propylene chain, 2 H,  $J = 6.5$  Hz), 4.45 (s, Ar- $\text{CH}_2$ , 2 H), 4.46 (s, Ar- $\text{CH}_2$ , 2 H), 7.03 (br-s, Ar, 4H), 7.20 (br-s, Ts, 4 H), 7.37 (m, Ts, 4H), 7.45-7.48 (m, Phen-9, 2 H), 7.62-7.77 (m, Phen-2, Phen-3, Phen-7, 6 H), 8.16 (d, Phen-4, 2 H,  $J_{3-4} = 7.8$  Hz), 8.45-8.54 (m, Phen-1, Phen-10, 4 H) ppm;  $^{13}\text{C}$ -NMR ( $\text{CDCl}_3$ )  $\delta$ : 10.82 ( $\text{CH}_3$ ), 21.17 (Ts- $\text{CH}_3$ ), 21.55, 29.63, 31.11, 42.41, 42.59, 49.06, 52.17, 122.09, 123.24, 123.52, 123.52, 123.70, 123.77, 125.37, 126.55, 127.03, 127.09, 127.77, 127.84, 128.77, 128.87, 129.10, 129.21, 129.45, 129.56, 129.91, 129.95, 130.75, 131.04, 131.15, 131.80, 132.43, 132.61, 134.60, 134.75, 135.05, 137.04, 137.12, 137.86, 137.99, 143.59, 143.93, 159.61, 159.67 ppm; IR (KBr)  $\nu$ : 3448, 3067, 2959, 2924, 2853, 2361, 2343, 1655, 1578, 1508, 1458, 1344, 1161, 1090, 1020, 968, 812, 766, 725, 708, 667, 586, 548, 473  $\text{cm}^{-1}$ ; Anal. Calcd for  $\text{C}_{54}\text{H}_{49}\text{BrN}_4\text{O}_4\text{S}_2$  (Mr 962.05  $\text{g mol}^{-1}$ )  $\times \text{CH}_3\text{OH}$ : C 66.39, H 5.33, N 5.63 %; Found: C 66.55, H 5.35, N 5.81 %; (MALDI / TOF-HRMS)  $m/z$ : 961.2406 (cald. for  $\text{C}_{54}\text{H}_{49}\text{BrN}_4\text{O}_4\text{S}_2$ : 961.2451).

**1-([8-(3-(urac-1-yl)propyltosyl)aminophenanthridine-6-yl]-methyl)-4-([8-(propyltosyl)aminophenanthridine-6-yl]-methyl)benzene (4)**

Uracil (99 mg, 0.88 mmol, 10 equivalents) that was previously dried, and NaH (35 mg, 60% w.w., 0.88 mmol, 10 equivalents) were suspended in dry DMF (5 ml) and stirred during 1 h in argon atmosphere at room temperature. To this suspension, a solution of 1-([8-(3-bromopropyltosyl)aminophenanthridine-6-yl]-methyl)-4-([8-(propyltosyl)aminophenanthridine-6-yl]-methyl)benzene (**3**) (85 mg; 0.088 mmol) in dry DMF (10 ml) was added dropwise and the reaction mixture was stirred during 48 hours under argon atmosphere at 50 °C. Then, water and  $\text{CH}_2\text{Cl}_2$  were carefully added to this suspension. The water layer was washed twice with  $\text{CH}_2\text{Cl}_2$ , organic extracts were dried over  $\text{Na}_2\text{SO}_4$  and evaporated, yielding solid residue (68 mg) that was

purified by TLC (SiO<sub>2</sub>, 10% MeOH in CH<sub>2</sub>Cl<sub>2</sub>, R<sub>f</sub> = 0.46). Compound **4** was obtained as white solid (20 mg, 23 %yield) that was additionally recrystallized from MeOH; mp 153-156 °C; <sup>1</sup>H-NMR (CDCl<sub>3</sub>) δ: 0.66 (t, CH<sub>3</sub>, 3H, *J* = 7.81 Hz), 1.11 (m, CH<sub>2</sub>-propyl chain, 2 H), 1.49 (t, CH<sub>2</sub>-propylene chain, 2 H, *J* = 6.5 Hz), 2.38 (s, Ts-CH<sub>3</sub>, 3 H), 2.40 (s, Ts-CH<sub>3</sub>, 3 H), 3.40 (t, NCH<sub>2</sub>-propyl chain, 2 H, *J* = 6.7 Hz), 3.45 (t, NCH<sub>2</sub>-propylene chain, 2 H, *J* = 6.3 Hz), 3.50 (t, CH<sub>2</sub>-uracil-propylene chain, 2H, *J* = 6.7 Hz), 4.43 (s, Ar-CH<sub>2</sub>, 2 H), 4.48 (s, Ar-CH<sub>2</sub>, 2 H), 5.57 (d, uracil-5, 1 H, *J*<sub>5-6</sub> = 7.9 Hz), 7.02-7.06 (m, Ar, uracil-6, 5 H), 6.91 (d, uracil-6, 1H), 7.18 (d, Ts, 4H, *J* = 8.1 Hz), 7.21 (d, Ts, 4H, *J* = 8.1 Hz), 7.35-7.38 (m, Ts, 4 H) 7.47 (m, Phen-9, 2H), 7.64-7.76 (m, Phen-2, Phen-3, Phen-7, 6 H), 8.15 (br s, Phen-4, 2 H), 8.46 (d, Phen-1, 2 H, *J*<sub>1-2</sub> = 8.1 Hz), 8.50-8.54 (m, Phen-10, 2 H), 9.24 (s, U-NH, 1 H) ppm; <sup>13</sup>C-NMR (CDCl<sub>3</sub>) δ: 10.81 (CH<sub>3</sub>), 21.18 (CH<sub>2</sub>-propyl chain), 21.50 (TsCH<sub>3</sub>), 21.52 (TsCH<sub>3</sub>), 27.07 (CH<sub>2</sub>-uracil-propylene chain), 45.95 (CH<sub>2</sub>-uracil), 47.61 (NCH<sub>2</sub>-propylene chain), 52.07 (NCH<sub>2</sub>-propyl chain), 61.47 (Ar-CH<sub>2</sub>), 69.11(Ar-CH<sub>2</sub>), 102.01 (uracil-5), 114.59, 121.11, 122.02, 122.06, 123.16, 123.26, 123.49, 123.82, 125.32, 125.35, 126.62, 126.72, 127.17, 127.67, 127.72, 127.78, 127.83, 128.72, 128.83, 129.22, 129.31, 129.40, 129.45, 129.50, 129.59, 129.68, 132.77, 134.1, 135.01, 143.61, 144.13, 144.75, 150.48, 159.45, 159.6, 163.45 ppm; IR (KBr) ν: 3448, 2924, 2853, 2363, 2345, 1718, 1686, 1655, 1560, 1541, 1508, 1458, 1163, 1090, 812, 766, 669, 550, 471, 459 cm<sup>-1</sup>; (MALDI / TOF-HRMS) *m/z*: 993.3466 (cald. for C<sub>58</sub>H<sub>52</sub>N<sub>6</sub>O<sub>6</sub>S<sub>2</sub>: 993.3463).

### **2,6-Ditosyl-2,6-diaza-1,7(8,6)-diphenanthridinacyclotridecaphane (5)**

1,3-dibromopropane (20 μl, 0.193 mmol, 1.5 equivalents) and K<sub>2</sub>CO<sub>3</sub> (53 mg, 0.386 mmol, 3 equivalents) were suspended in dry DMF (20ml). To this suspension, solution 1,6-bis-(8-tosylaminophenantridine-6-yl)-hexane<sub>1</sub> (100 mg; 0.128 mmol 1 equivalent) in dry DMF (5 ml) was added dropwise during 10 min. and the reaction mixture was stirred during 5 days under argon atmosphere at room temperature. Water and CH<sub>2</sub>Cl<sub>2</sub> were added to this suspension, the water layer was washed twice with CH<sub>2</sub>Cl<sub>2</sub>, organic extracts were dried over Na<sub>2</sub>SO<sub>4</sub> and evaporated, yielding light brown solid. Solid residue was purified was by TLC (SiO<sub>2</sub>, 10% MeOH in CH<sub>2</sub>Cl<sub>2</sub>, R<sub>f</sub> = 0.35) to give white solid **5**, additionally recrystallized from MeOH (27 mg, 26 %

yield); mp 223-225 °C; <sup>1</sup>H-NMR (CDCl<sub>3</sub>) δ: 1.44 (br s, CH<sub>2</sub>-propyl chain, 4 H), 1.57 (br s, CH<sub>2</sub>-hexylene-chain, 4 H), 1.87 (t, CH<sub>2</sub>-propyl chain, 2 H, *J* = 6.9 Hz), 2.25 (s, Ts-CH<sub>3</sub>, 6 H), 3.12 (t, CH<sub>2</sub>-hexylene-chain, 4 H, *J* = 7.6 Hz), 3.65 (t, NCH<sub>2</sub>, 4 H), 6.92 (d, Ts, 4H, *J* = 8.0 Hz), 7.17 (d, Ts, 4H), 7.55 (dd, Phen-9, 2 H, *J*<sub>7-9</sub> = 2.0 Hz, *J*<sub>9-10</sub> = 8.8 Hz), 7.60-7.66 (m, Phen-2, Phen-7, 4 H), 7.75 (dt, Phen-3, 2 H, *J*<sub>3-4</sub> = 7.8 Hz, *J*<sub>1-3</sub> = 1.3 Hz), 8.12 (d, Phen-4, 2 H), 8.46 (dd, Phen-1, 2 H, *J*<sub>1-2</sub> = 8.2 Hz), 8.58 (d, Phen-10, 2 H) ppm; <sup>13</sup>C NMR (CDCl<sub>3</sub>) δ: 21.44 (Ts-CH<sub>3</sub>), 28.68 (CH<sub>2</sub>-propyl chain), 28.94 (CH<sub>2</sub>-hexylene-chain), 29.35 (CH<sub>2</sub>-hexylene-chain), 36.41 (CH<sub>2</sub>-hexylene-chain), 48.45 (NCH<sub>2</sub>), 122.05, 122.96, 123.88, 125.22, 125.71, 126.96, 127.57, 129.35, 129.45, 130.79, 132.43, 134.15, 138.08, 143.92, 162.04 ppm; IR (KBr) ν: 3454, 2928, 2858, 2361, 2343, 1653, 1541, 1508, 1458, 1356, 1167, 1149, 1090, 1067, 943, 810, 762, 710, 662, 592, 546, 419, 407, 397, 351 cm<sup>-1</sup>; (MALDI / TOF-HRMS) *m/z*: 819.3003 (calcd. for C<sub>49</sub>H<sub>46</sub>N<sub>4</sub>O<sub>4</sub>S<sub>2</sub>: 819.3033).

**2,10-Ditosyl-2,10-diaza-6(3,1)-uracil-1,11(8,6)-  
diphenanthridinacycloheptadecaphane (6)**

1,3-bis-(3-bromopropyl)-uracil<sub>4</sub> (136 mg, 0.386 mmol, 1.5 equivalents) and K<sub>2</sub>CO<sub>3</sub> (178 mg, 1.28 mmol, 5 equivalents) were suspended in dry DMF (80ml). To this suspension, solution 1,6-bis-(8-tosylaminophenanthridine-6-yl)-hexane<sub>1</sub> (200 mg; 0.257 mmol 1 equivalent) in dry DMF (70 ml) was added dropwise during 10 min. The reaction mixture was stirred during 2 days under argon atmosphere at room temperature, and next 2 days at 80-100 °C. Water and CH<sub>2</sub>Cl<sub>2</sub> were added to this suspension, the water layer was washed twice with CH<sub>2</sub>Cl<sub>2</sub>, organic extracts were dried over Na<sub>2</sub>SO<sub>4</sub> and evaporated, yielding light brown oily residue. Residue was purified by TLC (SiO<sub>2</sub>, 5% MeOH in CH<sub>2</sub>Cl<sub>2</sub>, R<sub>f</sub> = 0.35). Obtained light oil was triturated with water to give precipitate that was filtered, washed with water and dried. Pure compound **6** was obtained as white solid (130 mg, 52 % yield), that was additionally recrystallized from MeOH (27 mg, 26 %); mp 142-145 °C; <sup>1</sup>H-NMR (CDCl<sub>3</sub>) δ: 1.53 (br s, CH<sub>2</sub>-hexylene-chain, 4 H), 1.81 (br s, CH<sub>2</sub>-hexylene-chain, 2 H), 1.90 (m, CH<sub>2</sub>-hexylene-chain, CH<sub>2</sub>-propylene chain (b), 4 H), 2.00 (t, CH<sub>2</sub>-propylene chain (a), 2 H), 2.35 (s, Ts-CH<sub>3</sub>, 3 H), 2.39 (s, Ts-CH<sub>3</sub>, 3 H), 3.25 (br s, CH<sub>2</sub>-hexylene-chain (a), 2 H), 3.38 (br s, CH<sub>2</sub>-hexylene-chain (b), 2 H), 3.68 (t,

NCH<sub>2</sub>-propylene chain (b), 2 H,  $J = 6.3$  Hz), 3.76 (t, NCH<sub>2</sub>-propylene chain (a), 2 H,  $J = 6.0$  Hz), 3.91 (t, CH<sub>2</sub>-uracil-propylene chain (a), 2H,  $J = 6.1$  Hz), 4.04 (t, CH<sub>2</sub>-uracil-propylene chain (b), 2H,  $J = 6.7$  Hz), 5.77 (d, uracil-5, 1 H,  $J_{5-6} = 7.8$  Hz), 7.15 (d, Ts, 2H,  $J = 7.9$  Hz), 7.20 (d, Ts, 4H,  $J = 7.9$  Hz), 7.30-7.36 (m, Ts, Phen-9, uracil-6, 7 H), 7.61 (m, Phen-2, 2 H), 7.72 (m, Phen-3, 2 H), 7.83 (s, Phen-7 (a), 1 H), 8.12 (br s, Phen-4, 2 H), 8.28 (s, Phen-7 (b), 1 H), 8.42-8.47 (m, Phen-1, Phen-10, 3 H), 8.54 (d, Phen-1, 1 H,  $J_{1-2} = 8.8$  Hz) ppm; <sup>13</sup>C-NMR (CDCl<sub>3</sub>)  $\delta$ : 21.51 (TsCH<sub>3</sub>), 25.34 (CH<sub>2</sub>-propylene chain b), 27.03 (CH<sub>2</sub>-propylene chain a), 29.44 (CH<sub>2</sub>-hexylene-chain), 29.51 (CH<sub>2</sub>-hexylene-chain), 29.74 (CH<sub>2</sub>-hexylene-chain), 29.9 (CH<sub>2</sub>-hexylene-chain), 38.49 (CH<sub>2</sub>-hexylene-chain), 46.51 (CH<sub>2</sub>-uracil-propylene chain b), 47.01 (NCH<sub>2</sub>-propylene chain a), 47.29 (CH<sub>2</sub>-uracil-propylene chain a), 47.34 (NCH<sub>2</sub>-propylene chain b), 101.59 (uracil-5), 121.99, 122.99, 123.09, 123.33, 123.67 (Phen-1), 125.16, 125.45 (Phen-7 a), 126.64 (Phen-7 b), 127.56, 127.67, 127.74, 129.11, 129.5, 129.57, 132.29, 133.94, 134.64, 137.24, 142.67, 143.67, 144.03, 151.58, 162.1, 163.29 ppm; (MALDI / TOF-HRMS)  $m/z$ : 971.3629 (cald. for C<sub>56</sub>H<sub>54</sub>N<sub>6</sub>O<sub>6</sub>S<sub>2</sub>: 971.3619).

**1-[[8-(3-(urac-1-il)propyl)aminophenanthridine-6-il]-methyl]-4-[[8-(propyltosyl)aminophenanthridine-6-il]-methyl]benzene (7)**

Compound **7** was obtained by heating solution of 1-[[8-(3-(urac-1-il)propyltosyl)aminophenanthridine-6-il]-methyl]-4-[[8-(propyltosyl)aminophenanthridine-6-il]-methyl]benzene **4** (20 mg, 0.02 mmol) in mixture of 1 ml conc. H<sub>2</sub>SO<sub>4</sub> and 2 ml conc. acetic acid under reflux at 80-100 °C for 2 h. Reaction mixture was cooled, poured on ice and made alkaline (pH = 8-9) by addition of 2 M NaOH. The obtained yellow-brown solid was precipitated, filtered and washed with lots of water to afford pure compound **7** (8 mg, 57 % yield); mp 140-143 °C;  $R_f$  (SiO<sub>2</sub>, 10% MeOH in CH<sub>2</sub>Cl<sub>2</sub>) = 0.48; <sup>1</sup>H-NMR (DMSO-d<sub>6</sub>)  $\delta$ : 0.79 (t, CH<sub>3</sub>, 3H,  $J = 7.4$  Hz), 1.41 (m, CH<sub>2</sub>-propyl chain, 2 H), 1.80 (t, CH<sub>2</sub>-propylene chain, 2 H,  $J = 6.5$  Hz), 2.92 (m, NCH<sub>2</sub>-propyl chain, 2 H), 3.01 (m, NCH<sub>2</sub>-propylene chain, 2 H), 3.68 (t, CH<sub>2</sub>-uracil-propylene chain, 2H,  $J = 6.7$  Hz), 4.48 (s, Ar-CH<sub>2</sub>, 2 H), 4.48 (s, Ar-CH<sub>2</sub>, 2 H), 5.55 (d, uracil-5, 1 H,  $J_{5-6} = 7.7$  Hz), 6.20 (br s, NH, 2H), 7.00 (d, Phen-7, 1 H,  $J_{7-9} = 2.1$  Hz), 7.05 (d, Phen-7, 1 H,  $J_{7-9} = 1.6$  Hz), 7.17-7.22 (m, Ar,

Phen-9, 6 H), 7.51-7.56 (m, Phen-2, Phen-3, uracil-6, 5 H), 7.92 (m, Phen-4, 2 H), 8.43-8.49 (m, Phen-1, Phen-10, 4 H), 11.27 (s, uracil-NH, 1 H) ppm;  $^{13}\text{C}$ -NMR (DMSO- $d_6$ )  $\delta$ : 11.68 ( $\text{CH}_3$ ), 21.57 ( $\text{CH}_2$ -propyl chain), 27.79 ( $\text{CH}_2$ -uracil-propylene chain), 41.93, 42.07, 44.61, 45.99, 101.15, 103.62, 103.93, 120.17, 121.41, 121.47, 123.07, 123.43, 123.69, 123.79, 124.40, 124.47, 126.42, 126.54, 126.71, 128.77, 128.84, 129.23, 137.31, 137.37, 141.46, 141.56, 145.80, 145.86, 148.2, 148.47, 151.22, 159.25, 164.09, 172.44 ppm; IR (KBr)  $\nu$ : 3414, 2957, 2926, 2853, 2365, 2345, 1684, 1655, 1618, 1558, 1541, 1508, 1458, 1420, 1387, 1340, 1259, 1232, 1144, 1024, 824, 760, 719, 669, 621, 569, 548  $\text{cm}^{-1}$ ; (MALDI / TOF-HRMS)  $m/z$ : 685.3314 (cald. for  $\text{C}_{44}\text{H}_{40}\text{N}_6\text{O}_2$ : 685.3286).

### **2,6-Diaza-1,7(8,6)-diphenanthridinacyclotridecaphane (8)**

Compound **(8)** was obtained as described for **7**; 2,6-ditosyl-2,6-diaza-1,7(8,6)-diphenanthridinacyclotridecaphane **5** (30 mg, 0.037 mmol) in 1 ml conc.  $\text{H}_2\text{SO}_4$  and 2 ml conc. acetic acid gave yellow powder gave yellow powder **8** (15 mg, 78 % yield); mp 165-170  $^\circ\text{C}$ ;  $R_f$  ( $\text{SiO}_2$ , 10% MeOH in  $\text{CH}_2\text{Cl}_2$ ) = 0.52;  $^1\text{H}$ -NMR (DMSO- $d_6$ )  $\delta$ : 1.56 (br s,  $\text{CH}_2$ -hexylene-chain, 4 H), 1.84 (br s,  $\text{CH}_2$ -hexylene-chain, 4 H), 2.01 (t,  $\text{CH}_2$ -propyl chain, 2 H,  $J = 6.49$  Hz), 3.15 (br s,  $\text{CH}_2$ -hexylene-chain, 4 H), 3.42 (ps q,  $\text{NCH}_2$ , 4 H,  $J = 6.1$  Hz), 6.24 (br s, NH, 2H), 7.26 (d, Phen-7, 2H,  $J_{7-9} = 2.1$  Hz), 7.55 (dd, Phen-9, 2 H,  $J_{9-10} = 8.9$  Hz), 7.50 (m, Phen-2, Phen-3, 4 H), 7.86 (m, Phen-4, 2 H), 8.44 (m, Phen-1, 2 H), 8.46 (d, Phen-10, 2 H) ppm;  $^{13}\text{C}$  NMR (DMSO- $d_6$ )  $\delta$ : 20.53 ( $\text{CH}_2$ -propyl chain), 28.81 ( $\text{CH}_2$ -hexylene-chain), 29.07 ( $\text{CH}_2$ -hexylene-chain), 35.11 ( $\text{CH}_2$ -hexylene-chain), 40.31 ( $\text{NCH}_2$ ), 103.01 (Phen-7), 119.86 (Phen-9), 121.13 (Phen-1), 122.62, 123.58 (Phen-10), 123.93, 126.01 (Phen 2 ili Phen 3), 126.05 (Phen 2 ili Phen 3), 126.64, 128.78 (Phen-4), 141.42, 148.43, 161.11 ppm; IR (KBr)  $\nu$ : 3462, 2928, 2856, 2361, 2343, 1653, 1624, 1541, 1508, 1458, 1385, 1265, 1205, 1128, 824, 760, 716, 679, 669, 654, 617, 592, 548, 517, 501, 473, 457  $\text{cm}^{-1}$ ; (MALDI / TOF-HRMS)  $m/z$ : 511.2874 (cald. for  $\text{C}_{35}\text{H}_{34}\text{N}_4$ : 511.2856).

Compound **(8)** was obtained as described for **7**; 2,6-ditosyl-2,6-diaza-1,7(8,6)-diphenanthridinacyclotridecaphane **5** (30 mg, 0.037 mmol) in 1 ml conc.  $\text{H}_2\text{SO}_4$  and 2 ml conc. acetic acid gave yellow powder gave yellow powder **8** (15 mg, 78 % yield); mp 165-170  $^\circ\text{C}$ ;  $R_f$  ( $\text{SiO}_2$ , 10% MeOH in  $\text{CH}_2\text{Cl}_2$ ) = 0.52;  $^1\text{H}$ -NMR (DMSO- $d_6$ )  $\delta$ :

1.56 (br s, CH<sub>2</sub>-hexylene-chain, 4 H), 1.84 (br s, CH<sub>2</sub>-hexylene-chain, 4 H), 2.01 (t, CH<sub>2</sub>-propyl chain, 2 H,  $J = 6.49$  Hz), 3.15 (br s, CH<sub>2</sub>-hexylene-chain, 4 H), 3.42 (ps q, NCH<sub>2</sub>, 4 H,  $J = 6.1$  Hz), 6.24 (br s, NH, 2H), 7.26 (d, Phen-7, 2H,  $J_{7-9} = 2.1$  Hz), 7.55 (dd, Phen-9, 2 H,  $J_{9-10} = 8.9$  Hz), 7.50 (m, Phen-2, Phen-3, 4 H), 7.86 (m, Phen-4, 2 H), 8.44 (m, Phen-1, 2 H), 8.46 (d, Phen-10, 2 H) ppm; <sup>13</sup>C NMR (DMSO-d<sub>6</sub>) δ: 20.53 (CH<sub>2</sub>-propyl chain), 28.81 (CH<sub>2</sub>-hexylene-chain), 29.07 (CH<sub>2</sub>-hexylene-chain), 35.11 (CH<sub>2</sub>-hexylene-chain), 40.31 (NCH<sub>2</sub>), 103.01 (Phen-7), 119.86 (Phen-9), 121.13 (Phen-1), 122.62, 123.58 (Phen-10), 123.93, 126.01 (Phen 2 ili Phen 3), 126.05 (Phen 2 ili Phen 3), 126.64, 128.78 (Phen-4), 141.42, 148.43, 161.11 ppm; IR (KBr) ν: 3462, 2928, 2856, 2361, 2343, 1653, 1624, 1541, 1508, 1458, 1385, 1265, 1205, 1128, 824, 760, 716, 679, 669, 654, 617, 592, 548, 517, 501, 473, 457 cm<sup>-1</sup>; (MALDI / TOF-HRMS) m/z: 511.2874 (cald. for C<sub>35</sub>H<sub>34</sub>N<sub>4</sub>: 511.2856).

#### **2,10-Diaza-6(3,1)-uracil-1,11(8,6)-diphenanthridinacycloheptadecaphane (9)**

Compound **(9)** was obtained as described for **7**; 2,10-ditosyl-2,10-diaza-6(3,1)-uracil-1,11(8,6)-diphenanthridinacycloheptadecaphane **6** (50 mg, 0.051 mmol) in 1 ml conc. H<sub>2</sub>SO<sub>4</sub> and 2 ml conc. acetic acid gave yellow powder **9** (20 mg, 56 % yield); mp 143-146 °C; R<sub>f</sub> (SiO<sub>2</sub>, 10% MeOH in CH<sub>2</sub>Cl<sub>2</sub>) = 0.41; <sup>1</sup>H-NMR (DMSO-d<sub>6</sub>) δ: 1.55 (br s, CH<sub>2</sub>-hexylene-chain, 2 H), 1.65 (br s, CH<sub>2</sub>-hexylene-chain, 2H) 1.82 (m, CH<sub>2</sub>-propylene chain, 2 H), 1.88 (m, CH<sub>2</sub>-hexylene-chain, 4 H), 1.99 (m, CH<sub>2</sub>-propylene chain, 2 H), 3.16-3.23 (m, CH<sub>2</sub>-hexylene-chain, NCH<sub>2</sub>-propylene chain, 8 H), 3.91 (t, CH<sub>2</sub>-uracil-propylene chain, 2H,  $J = 6.5$  Hz), 3.96 (t, CH<sub>2</sub>-uracil-propylene chain, 2H,  $J = 6.6$  Hz), 5.71 (d, uracil-5, 1 H,  $J_{5-6} = 7.9$  Hz), 6.39 (t, NH, 1 H,  $J = 5.6$  Hz), 6.43 (t, NH, 1 H,  $J = 5.5$  Hz), 7.02 (dd, Phen-9, 1 H,  $J_{7-9} = 1.6$  Hz), 7.20-7.25 (m, Phen-7, Phen-9, 3 H), 7.31 (d, Phen-7, 1 H,  $J_{7-9} = 2.0$  Hz), 7.50-7.54 (m, Phen-2, Phen-3, 4 H), 7.74 (d, uracil-6, 1 H), 7.88 (m, Phen-4, 2 H), 8.48-8.51 (m, Phen-1, Phen-10, 4 H) ppm; <sup>13</sup>C-NMR (DMSO-d<sub>6</sub>) δ: 26.65, 27.69, 28.82, 28.95, 29.17, 34.84, 35.27, 40.26, 40.55, 100.36, 101.63, 103.06, 121.36, 122.86, 122.97, 123.03, 123.73, 123.77, 124.06, 124.09, 126.37, 126.42, 126.57, 126.79, 128.34, 144.09, 148.01, 148.22, 148.64, 151.53, 160.78, 160.86, 161.30, 162.44 ppm; IR (KBr) ν: 3337, 3057, 2926, 2853, 2361, 2343, 1701, 1653, 1618, 1570, 1541, 1508, 1458, 1394, 1339, 1317, 1259, 1232, 1203, 1094, 1032, 824, 760, 723, 673, 565, 419,

397  $\text{cm}^{-1}$ ; (MALDI / TOF-HRMS)  $m/z$ : 663.3442 (cald. for  $\text{C}_{42}\text{H}_{42}\text{N}_6\text{O}_2$ : 663.3414).

### Molecular modeling of compounds 7, 8 and 9

Each of the selected conjugates was placed in the center of the octahedral box filled with TIP3P type water molecules, a water buffer of 7 Å was used and  $\text{Cl}^-$  ions were added to neutralize the systems. Geometry optimization and molecular dynamics (MD) simulations were accomplished using the AMBER10 program package<sup>7</sup>. The solvated molecules were geometry optimized using steepest descent and conjugate gradient methods, 2500 steps of each. During 300 ps of equilibration, the temperature was linearly increasing from 0 K to 300 K, and the volume kept constant. The equilibrated systems were subjected to 30 ns of the productive unconstrained molecular dynamics (MD) simulation at constant temperature and pressure (300 K, 1 atm). The time step during the simulation was 1 fs and the temperature was kept constant using Langevin dynamics with a collision frequency of 1  $\text{ps}^{-1}$ . The simulations were accomplished using using Periodic Boundary Conditions (PBC). The Particle Mesh Ewald (PME) method was used for calculation of electrostatic interactions. In the direct space the pairwise interactions were calculated within the cutoff-distance of 11 Å.

All studied molecules were prepared in maximally folded shape with rings stacked conformations. During the MD simulations molecules retained their more or less stacking conformation with no water molecules accommodated within the two phenanthridinium units. The stacking interactions were most efficient between two phenanthridinium subunits. Compound **7** was stabilized by two intramolecular stacking interactions – face to face between uracil and phenanthridinium ring and face to edge between uracil and benzene ring. Molecules **8** and **9** were stabilized with intramolecular stacking interaction between two phenanthridinium rings. Compound **9** was additionally stabilized with one intramolecular H bond between uracil and neighbouring phenanthridinium ring. Obtained molecules are in accordance with the spectroscopic results.

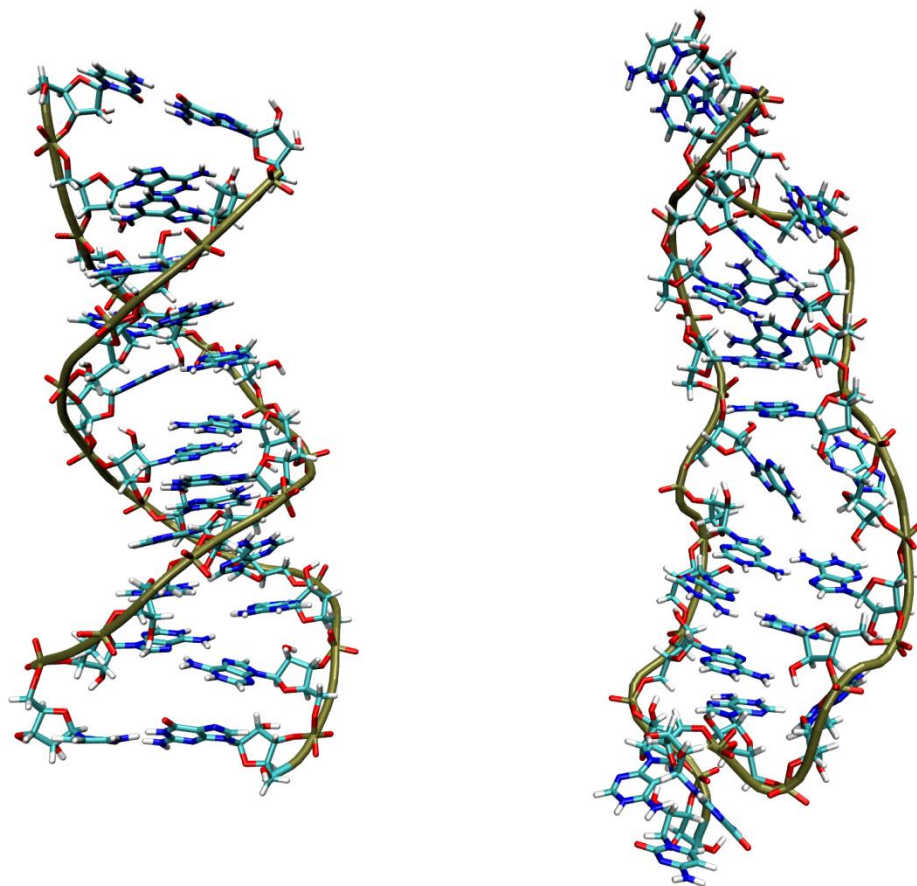

**Figure S1:** The model of poly rAH<sup>+</sup> - poly rAH<sup>+</sup> double helix. Left – initial optimized structure; right – final optimized structure (after 24 ns of MD simulations).

**Table S1.** MM\_PBSA calculated free energies for rAH<sup>+</sup> - rAH<sup>+</sup> in the complexes with **7** and **11**.

|                   | <i>rAH<sup>+</sup> - rAH<sup>+</sup> from the complex with 7</i> |       | <i>rAH<sup>+</sup> - rAH<sup>+</sup> from the complex with 11</i> |       |
|-------------------|------------------------------------------------------------------|-------|-------------------------------------------------------------------|-------|
| Energy (kcal/mol) | MEAN                                                             | STD   | MEAN                                                              | STD   |
| ELE               | -3599.74                                                         | 28.92 | -3183.85                                                          | 32.70 |
| VDW               | -178.64                                                          | 8.79  | 140.29                                                            | 12.47 |
| PBSUR             | 32.28                                                            | 0.39  | 37.00                                                             | 0.64  |

|       |          |       |          |       |
|-------|----------|-------|----------|-------|
| PBSOL | -1087.43 | 24.94 | -1536.42 | 31.38 |
| PBTOT | -3536.21 | 20.58 | -3493.42 | 22.79 |

**Table S2.** Partial atomic charges for rAH<sup>+</sup> obtained by fitting to the electrostatic potential at the 6-31G(d) level of theory<sup>8</sup> of the rAH<sup>+</sup>.

| Charges from ESP fit |           |
|----------------------|-----------|
| <b>P</b>             | 1.152084  |
| <b>O1P</b>           | -0.542651 |
| <b>O2P</b>           | -0.553623 |
| <b>O5'</b>           | -0.359532 |
| <b>C5'</b>           | -0.132427 |
| <b>C4'</b>           | 0.103212  |
| <b>O4'</b>           | -0.476126 |
| <b>C1</b>            | 0.366287  |
| <b>N9</b>            | -0.399005 |
| <b>C8</b>            | 0.403972  |
| <b>N7</b>            | -0.639266 |
| <b>C5</b>            | 0.018186  |
| <b>C6</b>            | 0.706746  |
| <b>N6</b>            | -0.958799 |
| <b>N1</b>            | -0.650846 |
| <b>C2</b>            | 0.459180  |
| <b>N3</b>            | -0.628821 |
| <b>C4</b>            | 0.582660  |
| <b>C3'</b>           | 0.514659  |
| <b>C2'</b>           | 0.264171  |
| <b>O3'</b>           | -0.903473 |
| <b>O2'</b>           | -0.704572 |
| <b>H51</b>           | 0.231265  |
| <b>H52</b>           | 0.074374  |
| <b>H4'</b>           | 0.079978  |
| <b>H1'</b>           | 0.126577  |
| <b>H8</b>            | 0.170362  |
| <b>H61</b>           | 0.448392  |
| <b>H62</b>           | 0.485280  |
| <b>H1</b>            | 0.447479  |
| <b>H2</b>            | 0.132692  |
| <b>H3'</b>           | -0.159075 |
| <b>H21</b>           | -0.064228 |
| <b>H22</b>           | 0.404887  |

Content of the rAH<sup>+</sup> parameter file used for the simulations of poly rAH<sup>+</sup>-poly rAH<sup>+</sup>.

#### MASS

|    |       |       |                                    |
|----|-------|-------|------------------------------------|
| OX | 16.00 | 0.465 | based on OS ether and ester oxygen |
| HX | 1.008 | 0.135 | based on HO hydroxyl group         |

#### BOND

|       |       |       |                                                 |
|-------|-------|-------|-------------------------------------------------|
| CT-OX | 320.0 | 1.410 | based on CT-OS JCC,7,(1986),230; NUCLEIC ACIDS  |
| HX-OH | 553.0 | 0.960 | based on HO-OH JCC,7,(1986),230; SUGARS,SER,TYR |
| CQ-NA | 502.0 | 1.324 | based on CQ-NC JCC,7,(1986),230; ADE            |
| NC-H5 | 394.1 | 1.018 |                                                 |
| CT-HO | 340.0 | 1.090 |                                                 |
| OH-H1 | 553.0 | 0.960 |                                                 |

#### ANGLE

|          |      |        |                                               |
|----------|------|--------|-----------------------------------------------|
| H1-CT-OX | 50.0 | 109.50 | based on H1-CT-OS changed based on NMA nmodes |
| CT-CT-OX | 50.0 | 109.50 | based on CT-CT-OS                             |
| CB-CA-NA | 70.0 | 117.30 | based on CB-CA-NC                             |
| NC-CQ-NA | 70.0 | 129.10 | based on NC-CQ-NC                             |
| H5-CQ-NA | 50.0 | 115.45 | based on H5-CQ-NC                             |
| CA-NA-CQ | 70.0 | 118.60 | based on CA-NC-CQ                             |
| CQ-NA-H  | 50.0 | 118.00 | based on CA-NA-H changed based on NMA nmodes  |
| CA-NC-H5 | 50.0 | 118.00 |                                               |
| CQ-NC-H5 | 50.0 | 118.00 |                                               |
| OH-CT-HO | 50.0 | 109.50 | changed based on H1-CT-OH                     |
| CT-OH-H1 | 55.0 | 108.50 | changed based on CT-OH-HO                     |
| CT-CT-HO | 50.0 | 109.50 | changed based on NMA nmodes                   |
| CT-CT-H0 | 50.0 | 109.50 | changed based on NMA nmodes                   |
| O2-P-OS  | 45.0 | 102.60 | changed based on OH-P-OS                      |
| O2-P-O2  | 45.0 | 102.60 | changed based on OS-P-OS                      |

#### DIHEDRAL

|             |   |       |      |     |                                         |
|-------------|---|-------|------|-----|-----------------------------------------|
| OX-CT-CT-OS | 1 | 0.144 | 0.0  | -3. | based on OS-CT-CT-OS parm98, TC,PC,PAK  |
| OX-CT-CT-OS | 1 | 1.175 | 0.0  | 2.  | based on OS-CT-CT-OS Piotr et al.       |
| H1-CT-CT-OX | 1 | 0.25  | 0.0  | 1.  | based on H1-CT-CT-OS Junmei et al, 1999 |
| OX-CT-CT-OH | 1 | 0.144 | 0.0  | -3. | based on OS-CT-CT-OH parm98, TC,PC,PAK  |
| OX-CT-CT-OH | 1 | 1.175 | 0.0  | 2.  | based on OS-CT-CT-OH parm98, TC,PC,PAK  |
| X -NA-CQ- X | 4 | 9.60  | 80.0 | 2.  |                                         |

#### NONBON

|    |        |        |                        |
|----|--------|--------|------------------------|
| OX | 1.6837 | 0.1700 | based on OS OPLS ether |
|----|--------|--------|------------------------|

HX            0.6000            0.0157    based on HS W. Cornell CH<sub>3</sub>SH --> CH<sub>3</sub>OH FEP

<sup>1</sup> L.-M. Tumir, M. Grabar, S. Tomić, I. Piantanida, *Tetrahedron*. 2010, **66**, 2501.

<sup>2</sup> P. Čudić, M. Žinić, V. Škarić, R. Kiralj, B. Kojić-Prodić, J.-P. Vigneron, J.-M. Lehn, *Croat. Chem. Acta*, 1996, **69**, 569.

<sup>3</sup> G. T. Morgan, L. P. Walls, *J. Chem. Soc.* 1931, 2447.

<sup>4</sup> V. S. Reznik, I. Sh. Salikhov, Yu. S. Shvetsov A. N. Shirshov, V. S. Bakulin, B. E. Ivanov *Russ Chem Bull* 1977, **26**, 803.

<sup>5</sup> L.-M. Tumir, I. Piantanida, P. Novak, M. Žinić, *J. Phys. Org. Chem.*, 2002, **15**, 599.

<sup>6</sup> P. Čudić, M. Žinić, V. Tomišić, V. Simeon, J.-P. Vigneron, J.-M. Lehn, *J. Chem. Soc., Chem. Commun.* 1995, 1073.

<sup>7</sup> <http://amber.scripps.edu/>

<sup>8</sup> M. J. Frisch, G. W. Trucks, H. B. Schlegel, G. E. Scuseria, M. A. Robb, J. R. Cheeseman, J. A. Montgomery, T. Vreven, K. N. Kudin, J. C. Burant, J. M. Millam, S. S. Iyengar, J. Tomasi, V. Barone, B. Mennucci, M. Cossi, G. Scalmani, N. Rega, G. A. Petersson, H. Nakatsuji, M. Hada, M. Ehara, K. Toyota, R. Fukuda, J. Hasegawa, M. Ishida, T. Nakajima, Y. Honda, O. Kitao, H. Nakai, M. Klene, X. Li, J. E. Knox, H. P. Hratchian, J. B. Cross, V. Bakken, C. Adamo, J. Jaramillo, R. Gomperts, R. E. Stratmann, O. Yazyev, A. J. Austin, R. Cammi, C. Pomelli, J. W. Ochterski, P. Y. Ayala, K. Morokuma, G. A. Voth, P. Salvador, J. J. Dannenberg, V. G. Zakrzewski, S. Dapprich, A. D. Daniels, M. C. Strain, O. Farkas, D. K. Malick, A. D. Rabuck, K. Raghavachari, J. B. Foresman, J. V. Ortiz, Q. Cui, A. G. Baboul, S. Clifford, J. Cioslowski, B. B. Stefanov, G. Liu, A. Liashenko, P. Piskorz, I. Komaromi, R. L. Martin, D. J. Fox, T. Keith, M. A. Al-Laham, C. Y. Peng, A. Nanayakkara, M. Challacombe, P. M. W. Gill, B. Johnson, W. Chen, M. W. Wong, C. Gonzalez, J. A. Pople, *Gaussian 03*, Gaussian, Inc.: Pittsburgh 2003.
